# Supplementary material
Source: publisher site journal article supplement (https://www.dovepress.com/article/266533)
Supplement: Supplementary file 1 [file get_supplementary_file.php]

**
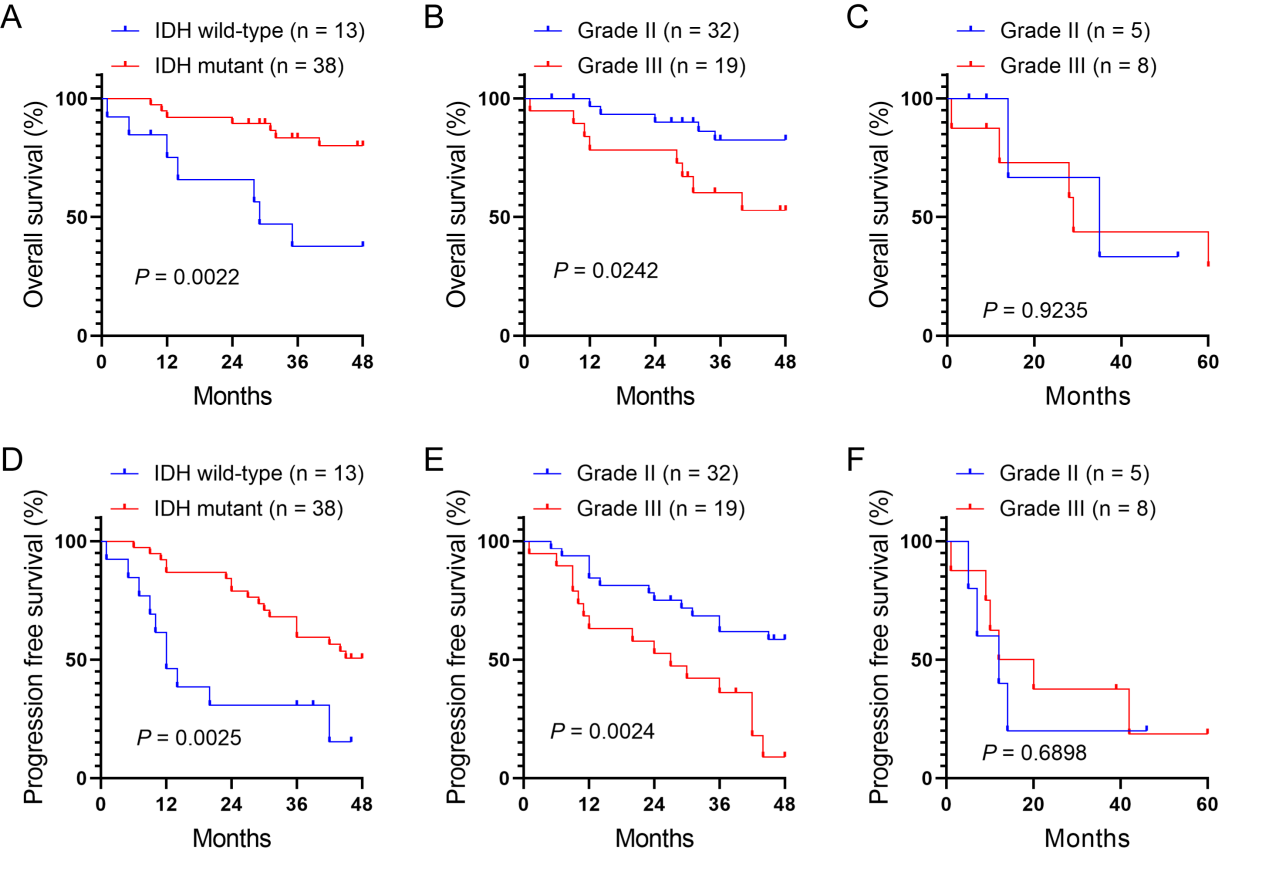
**

**Figure S1.** **IDH mutation status and glioma grading are associated with PFS and OS of patients with LGGs at the four-year follow-up.** Kaplan-Meier survival analyses show OS and PFS of patients with different types of LGGs. (**A and D**) The patients were divided into two groups, IDH wild type and IDH mutation, based on the IDH genotype; (**B and E**) the patients were divided into two groups, grade II and III, based on glioma grading; (**C and F**) the patients were divided into two groups, grade II and III, which were both IDH wild-type.
